# Supplementary material for: Oxygen-enhanced MRI and radiotherapy in patients with oropharyngeal squamous cell carcinoma
Source: PubMed Central journal article supplement — Clin Transl Radiat Oncol. 2022 Dec 17;39:100563. doi: 10.1016/j.ctro.2022.100563 (PMC9841018; doi:10.1016/j.ctro.2022.100563), 2022-12-17
Supplement: mmc1.pdf [file mmc1.pdf]

## Supplementary Materials

**Supplementary Table S1.** The resulting image dataset from the study, alongside patient outcome (responders = 1, non-responders = 0).

| Patient:         | 102            | 103 | 104 | 105 | 106 | 108 | 110 | 111 | 112 | 113 | 114 | 115 |
|------------------|----------------|-----|-----|-----|-----|-----|-----|-----|-----|-----|-----|-----|
| Visit 1<br>MOLLI | Air            | x   | x   | x   | x   | x   |     | x   | x   | x   | x   | x   |
|                  | O <sub>2</sub> | x   | x   | x   | x   | x   |     | x   | x   | x   | x   |     |
| Visit 2<br>MOLLI | Air            | x   |     | x   |     |     |     | x   | x   | x   |     |     |
|                  | O <sub>2</sub> | x   |     | x   |     |     |     |     |     |     |     |     |
| Visit 1<br>VFA   | Air            | x   | x   | x   | x   | x   | x   | x   | x   | x   | x   | x   |
|                  | O <sub>2</sub> | x   | x   | x   | x   | x   |     |     |     |     |     |     |
| Visit 2<br>VFA   | Air            | x   | x   | x   | x   | x   | x   | x   | x   | x   | x   | x   |
|                  | O <sub>2</sub> | x   | x   | x   | x   | x   |     |     |     |     |     |     |
| Outcome          | 1              | 0   | 1   | 1   | 1   | 0   | 0   | 1   | 1   | 1   | 1   | 1   |

**Supplementary Table S2.** The descriptive statistics of R1 values in each tumour ROI.

|                                | 102 V1 Air | 102 V1 Ox | 103 V1 Air | 103 V1 Ox | 104 V1 Air | 104 V1 Ox | 104 V1st 1 Ox | 105 V1 Air | 105 V1 Ox | 106 V1 Air | 106 V1 Ox | 106 V1st 1 Ox | 108 V1 Air | 108 V1 Ox | 110 V1 Air | 110 V1 Ox | 111 V1 Air | 111 V1 Ox | 112 V1 Air | 112 V1 Ox | 113 V1 Air | 113 V1 Ox | 114 V1 Air | 114 V1 Ox | 115 V1 Air | 115 V1 Ox |  |
|--------------------------------|------------|-----------|------------|-----------|------------|-----------|---------------|------------|-----------|------------|-----------|---------------|------------|-----------|------------|-----------|------------|-----------|------------|-----------|------------|-----------|------------|-----------|------------|-----------|--|
| <b>Mean</b>                    | 0.405      | 0.446     | 0.566      | 0.566     | 0.750      | 0.750     | 0.758         | 0.611      | 0.719     | 1.079      | 1.078     | 1.078         | 0.568      | 0.540     | 0.540      | 0.542     | 0.894      | 0.678     | 0.707      | 0.711     |            |           |            |           |            |           |  |
| <b>Standard Error</b>          | 0.001      | 0.001     | 0.003      | 0.003     | 0.002      | 0.002     | 0.002         | 0.002      | 0.003     | 0.006      | 0.005     | 0.005         | 0.005      | 0.003     | 0.003      | 0.002     | 0.012      | 0.004     | 0.017      | 0.005     |            |           |            |           |            |           |  |
| <b>Median</b>                  | 0.398      | 0.428     | 0.556      | 0.567     | 0.744      | 0.744     | 0.746         | 0.576      | 0.647     | 1.065      | 1.122     | 1.122         | 0.575      | 0.522     | 0.522      | 0.525     | 0.915      | 0.678     | 0.690      | 0.665     |            |           |            |           |            |           |  |
| <b>Mode</b>                    | 0.443      | 0.416     | 0.570      | 0.585     | 0.758      | 0.758     | 0.789         | 0.576      | 0.598     | 1.043      | 1.174     | 1.174         | 0.582      | 0.457     | 0.457      | 0.498     | 1.093      | 0.704     | 0.797      | 0.629     |            |           |            |           |            |           |  |
| <b>Standard Deviation</b>      | 0.116      | 0.123     | 0.120      | 0.135     | 0.130      | 0.130     | 0.140         | 0.171      | 0.244     | 0.248      | 0.203     | 0.203         | 0.063      | 0.105     | 0.105      | 0.092     | 0.237      | 0.115     | 0.253      | 0.239     |            |           |            |           |            |           |  |
| <b>Sample Variance</b>         | 0.014      | 0.015     | 0.014      | 0.018     | 0.017      | 0.017     | 0.019         | 0.029      | 0.060     | 0.062      | 0.041     | 0.041         | 0.004      | 0.011     | 0.011      | 0.008     | 0.056      | 0.013     | 0.064      | 0.057     |            |           |            |           |            |           |  |
| <b>Kurtosis</b>                | 18.717     | 0.662     | 0.061      | -0.072    | 0.364      | 0.364     | 2.398         | 4.624      | 1.910     | -0.320     | 0.078     | -0.451        | 0.010      | 1.203     | 1.203      | 7.328     | 4.123      | 4.154     | 8.510      | 2.438     |            |           |            |           |            |           |  |
| <b>Skewness</b>                | 1.976      | 0.912     | 0.757      | 0.804     | 1.060      | 1.060     | 1.055         | 1.396      | 1.482     | 0.362      | -0.679    | -0.487        | 0.658      | 0.905     | 0.905      | 1.092     | 0.585      | 1.151     | 2.438      | 1.971     |            |           |            |           |            |           |  |
| <b>Range</b>                   | 1.747      | 0.912     | 0.757      | 0.804     | 1.060      | 1.060     | 1.045         | 2.027      | 1.279     | 1.445      | 1.071     | 0.292         | 0.619      | 0.588     | 0.588      | 2.292     | 1.386      | 1.971     | 2.278      |           |            |           |            |           |            |           |  |
| <b>Minimum</b>                 | 0.098      | 0.157     | 0.196      | 0.188     | 0.196      | 0.196     | 0.435         | 0.256      | 0.371     | 0.579      | 0.497     | 0.381         | 0.268      | 0.313     | 0.313      | 0.209     | 0.218      | 0.016     | 0.016      |           |            |           |            |           |            |           |  |
| <b>Maximum</b>                 | 1.845      | 1.070     | 0.953      | 0.992     | 1.256      | 1.256     | 1.479         | 2.283      | 1.650     | 2.024      | 1.567     | 0.673         | 0.887      | 0.901     | 0.901      | 2.525     | 1.595      | 2.188     | 2.294      |           |            |           |            |           |            |           |  |
| <b>Sum</b>                     | 2586.464   | 3530.873  | 944.509    | 957.578   | 4944.553   | 4944.553  | 4999.086      | 3611.505   | 4859.260  | 1879.719   | 2007.647  | 106.866       | 676.634    | 934.913   | 359.526    | 693.326   | 160.591    | 1673.345  |            |           |            |           |            |           |            |           |  |
| <b>Count</b>                   | 6387.000   | 7918.000  | 1668.000   | 1692.000  | 6596.000   | 6596.000  | 6596.000      | 5912.000   | 6760.000  | 1742.000   | 1862.000  | 188.000       | 1252.000   | 1724.000  | 402.000    | 1023.000  | 227.000    | 2353.000  |            |           |            |           |            |           |            |           |  |
| <b>Largest(1)</b>              | 1.845      | 1.070     | 0.953      | 0.992     | 1.256      | 1.256     | 1.479         | 2.283      | 1.650     | 2.024      | 1.567     | 0.673         | 0.887      | 0.901     | 0.901      | 2.525     | 1.595      | 2.188     | 2.294      |           |            |           |            |           |            |           |  |
| <b>Smallest(1)</b>             | 0.098      | 0.157     | 0.196      | 0.188     | 0.196      | 0.196     | 0.435         | 0.256      | 0.371     | 0.579      | 0.497     | 0.381         | 0.268      | 0.313     | 0.313      | 0.209     | 0.218      | 0.016     | 0.016      |           |            |           |            |           |            |           |  |
| <b>Confidence Level(95.0%)</b> | 0.003      | 0.003     | 0.006      | 0.006     | 0.003      | 0.003     | 0.003         | 0.004      | 0.006     | 0.012      | 0.009     | 0.009         | 0.009      | 0.006     | 0.006      | 0.004     | 0.023      | 0.007     | 0.033      | 0.010     |            |           |            |           |            |           |  |

  

|                                | 102 V2 Air | 102 V2 Ox | 103 V2 Air | 103 V2 Ox | 104 V2 Air | 104 V2 Ox | 104 V2st 1 Ox | 105 V2 Air | 105 V2 Ox | 106 V2 Air | 106 V2 Ox | 106 V2st 1 Ox | 108 V2 Air | 108 V2 Ox | 110 V2 Air | 110 V2 Ox | 111 V2 Air | 111 V2 Ox | 112 V2 Air | 112 V2 Ox | 113 V2 Air | 113 V2 Ox | 114 V2 Air | 114 V2 Ox | 115 V2 Air | 115 V2 Ox |  |
|--------------------------------|------------|-----------|------------|-----------|------------|-----------|---------------|------------|-----------|------------|-----------|---------------|------------|-----------|------------|-----------|------------|-----------|------------|-----------|------------|-----------|------------|-----------|------------|-----------|--|
| <b>Mean</b>                    | 0.633      | 0.620     | 0.776      | 0.813     | 0.766      | 0.766     | 0.749         | 0.642      | 0.658     | 0.818      | 0.833     | 0.833         | 0.613      | 0.502     | 0.502      | 0.530     | 0.668      | 0.725     | 0.931      | 0.986     |            |           |            |           |            |           |  |
| <b>Standard Error</b>          | 0.001      | 0.001     | 0.004      | 0.007     | 0.003      | 0.003     | 0.003         | 0.002      | 0.002     | 0.003      | 0.003     | 0.003         | 0.010      | 0.004     | 0.004      | 0.002     | 0.010      | 0.011     | 0.022      | 0.009     |            |           |            |           |            |           |  |
| <b>Median</b>                  | 0.605      | 0.594     | 0.737      | 0.750     | 0.745      | 0.745     | 0.717         | 0.596      | 0.604     | 0.817      | 0.831     | 0.831         | 0.617      | 0.504     | 0.504      | 0.524     | 0.677      | 0.664     | 0.920      | 0.976     |            |           |            |           |            |           |  |
| <b>Mode</b>                    | 0.600      | 0.671     | 0.691      | 0.739     | 0.783      | 0.783     | 0.742         | 0.575      | 0.614     | 0.805      | 0.890     | 0.890         | 0.661      | 0.517     | 0.517      | 0.517     | 0.630      | 0.695     | 1.071      | 1.014     |            |           |            |           |            |           |  |
| <b>Standard Deviation</b>      | 0.167      | 0.169     | 0.191      | 0.263     | 0.178      | 0.178     | 0.178         | 0.206      | 0.207     | 0.138      | 0.117     | 0.117         | 0.085      | 0.093     | 0.093      | 0.083     | 0.150      | 0.272     | 0.295      | 0.310     |            |           |            |           |            |           |  |
| <b>Sample Variance</b>         | 0.028      | 0.028     | 0.037      | 0.069     | 0.032      | 0.032     | 0.032         | 0.043      | 0.043     | 0.019      | 0.014     | 0.014         | 0.007      | 0.007     | 0.007      | 0.023     | 0.074      | 0.087     | 0.096      | 0.096     |            |           |            |           |            |           |  |
| <b>Kurtosis</b>                | 0.342      | 1.047     | 0.235      | -0.117    | 30.502     | 30.502    | 29.753        | 3.037      | 2.314     | -0.001     | -0.415    | -0.415        | -0.869     | 2.648     | 2.648      | 2.268     | 0.924      | 11.469    | 1.069      | 1.946     |            |           |            |           |            |           |  |
| <b>Skewness</b>                | 0.752      | 0.768     | 0.710      | 0.707     | 3.929      | 3.929     | 4.453         | 1.549      | 1.522     | 0.182      | 0.043     | 0.043         | -0.035     | 0.831     | 0.831      | 0.613     | -0.589     | 2.640     | 0.227      | 0.951     |            |           |            |           |            |           |  |
| <b>Range</b>                   | 1.367      | 1.837     | 1.051      | 1.292     | 2.862      | 2.862     | 2.286         | 2.014      | 1.288     | 0.806      | 0.640     | 0.333         | 0.724      | 0.724     | 0.724      | 0.674     | 0.947      | 2.221     | 1.853      | 2.263     |            |           |            |           |            |           |  |
| <b>Minimum</b>                 | 0.286      | 0.251     | 0.344      | 0.273     | 0.385      | 0.385     | 0.446         | 0.223      | 0.258     | 0.415      | 0.496     | 0.443         | 0.231      | 0.231     | 0.231      | 0.295     | 0.046      | 0.143     | 0.112      | 0.153     |            |           |            |           |            |           |  |
| <b>Maximum</b>                 | 1.653      | 2.088     | 1.395      | 1.565     | 3.247      | 3.247     | 2.732         | 2.237      | 1.546     | 1.221      | 1.136     | 0.776         | 0.955      | 0.955     | 0.955      | 0.968     | 0.992      | 2.364     | 1.965      | 2.415     |            |           |            |           |            |           |  |
| <b>Sum</b>                     | 9169.244   | 8875.890  | 1586.563   | 1251.199  | 3493.607   | 3493.607  | 3414.067      | 4675.380   | 4887.539  | 1465.434   | 1448.978  | 1448.978      | 42.912     | 224.799   | 642.775    | 143.539   | 424.189    | 162.919   | 1156.148   |           |            |           |            |           |            |           |  |
| <b>Count</b>                   | 14495.000  | 14326.000 | 2044.000   | 1539.000  | 4559.000   | 4559.000  | 4559.000      | 7280.000   | 7431.000  | 1792.000   | 1739.000  | 1739.000      | 70.000     | 448.000   | 1212.000   | 215.000   | 585.000    | 175.000   | 1173.000   |           |            |           |            |           |            |           |  |
| <b>Largest(1)</b>              | 1.653      | 2.088     | 1.395      | 1.565     | 3.247      | 3.247     | 2.732         | 2.237      | 1.546     | 1.221      | 1.136     | 0.776         | 0.955      | 0.955     | 0.955      | 0.968     | 0.992      | 2.364     | 1.965      | 2.415     |            |           |            |           |            |           |  |
| <b>Smallest(1)</b>             | 0.286      | 0.251     | 0.344      | 0.273     | 0.385      | 0.385     | 0.446         | 0.223      | 0.258     | 0.415      | 0.496     | 0.443         | 0.231      | 0.231     | 0.231      | 0.295     | 0.046      | 0.143     | 0.112      | 0.153     |            |           |            |           |            |           |  |
| <b>Confidence Level(95.0%)</b> | 0.003      | 0.003     | 0.008      | 0.013     | 0.005      | 0.005     | 0.005         | 0.005      | 0.005     | 0.006      | 0.005     | 0.005         | 0.020      | 0.009     | 0.009      | 0.005     | 0.020      | 0.022     | 0.044      | 0.018     |            |           |            |           |            |           |  |

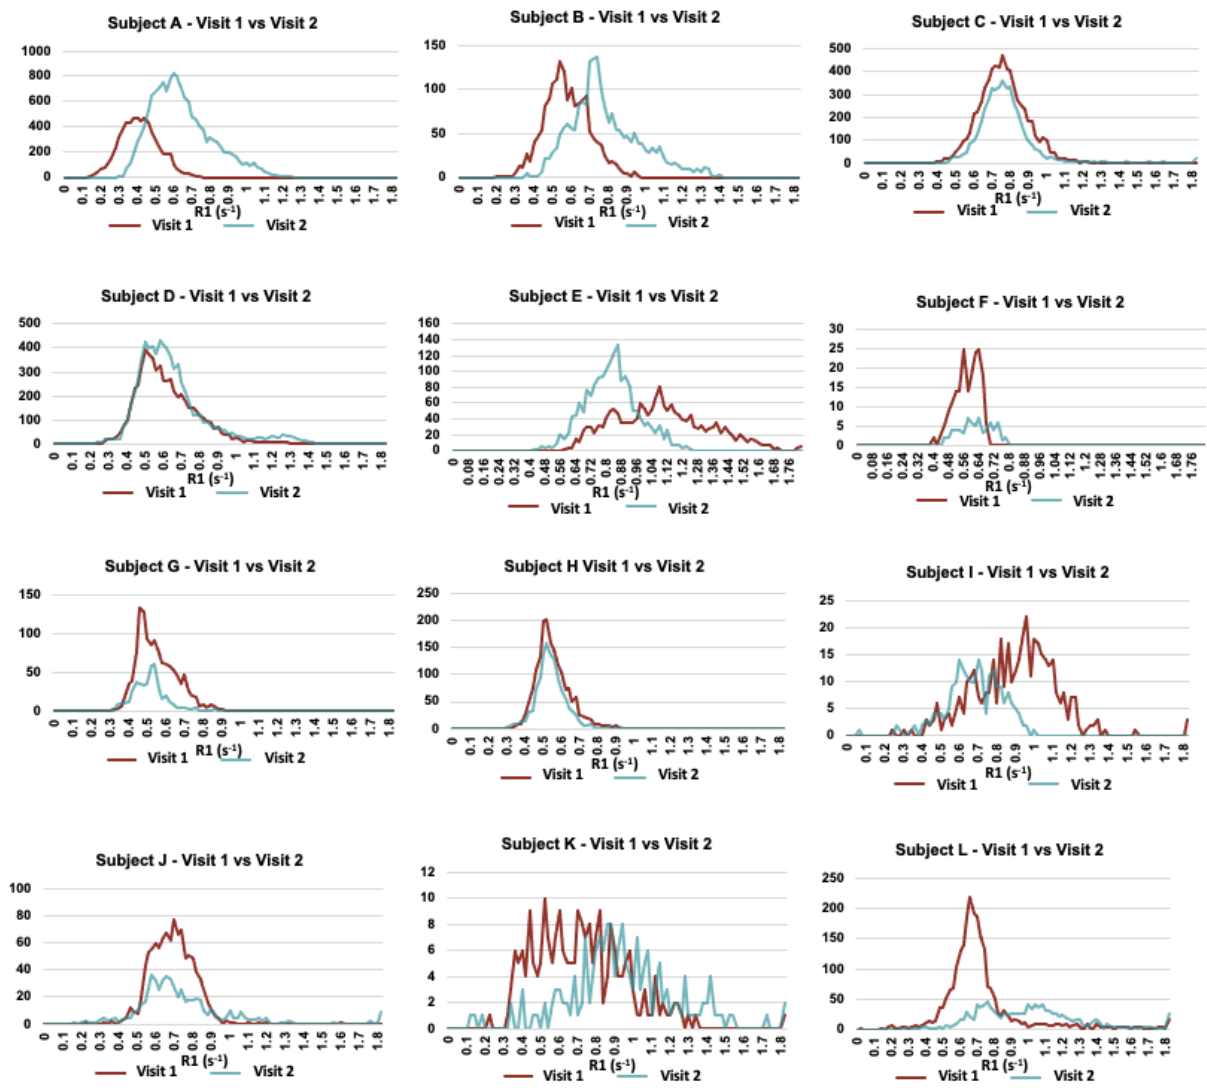

**Supplementary Figure S1.** Histograms of the R1 of the tumour ROI in all patients, on visit 1 and visit 2. The respective mean R1 values are shown in Figure 4.

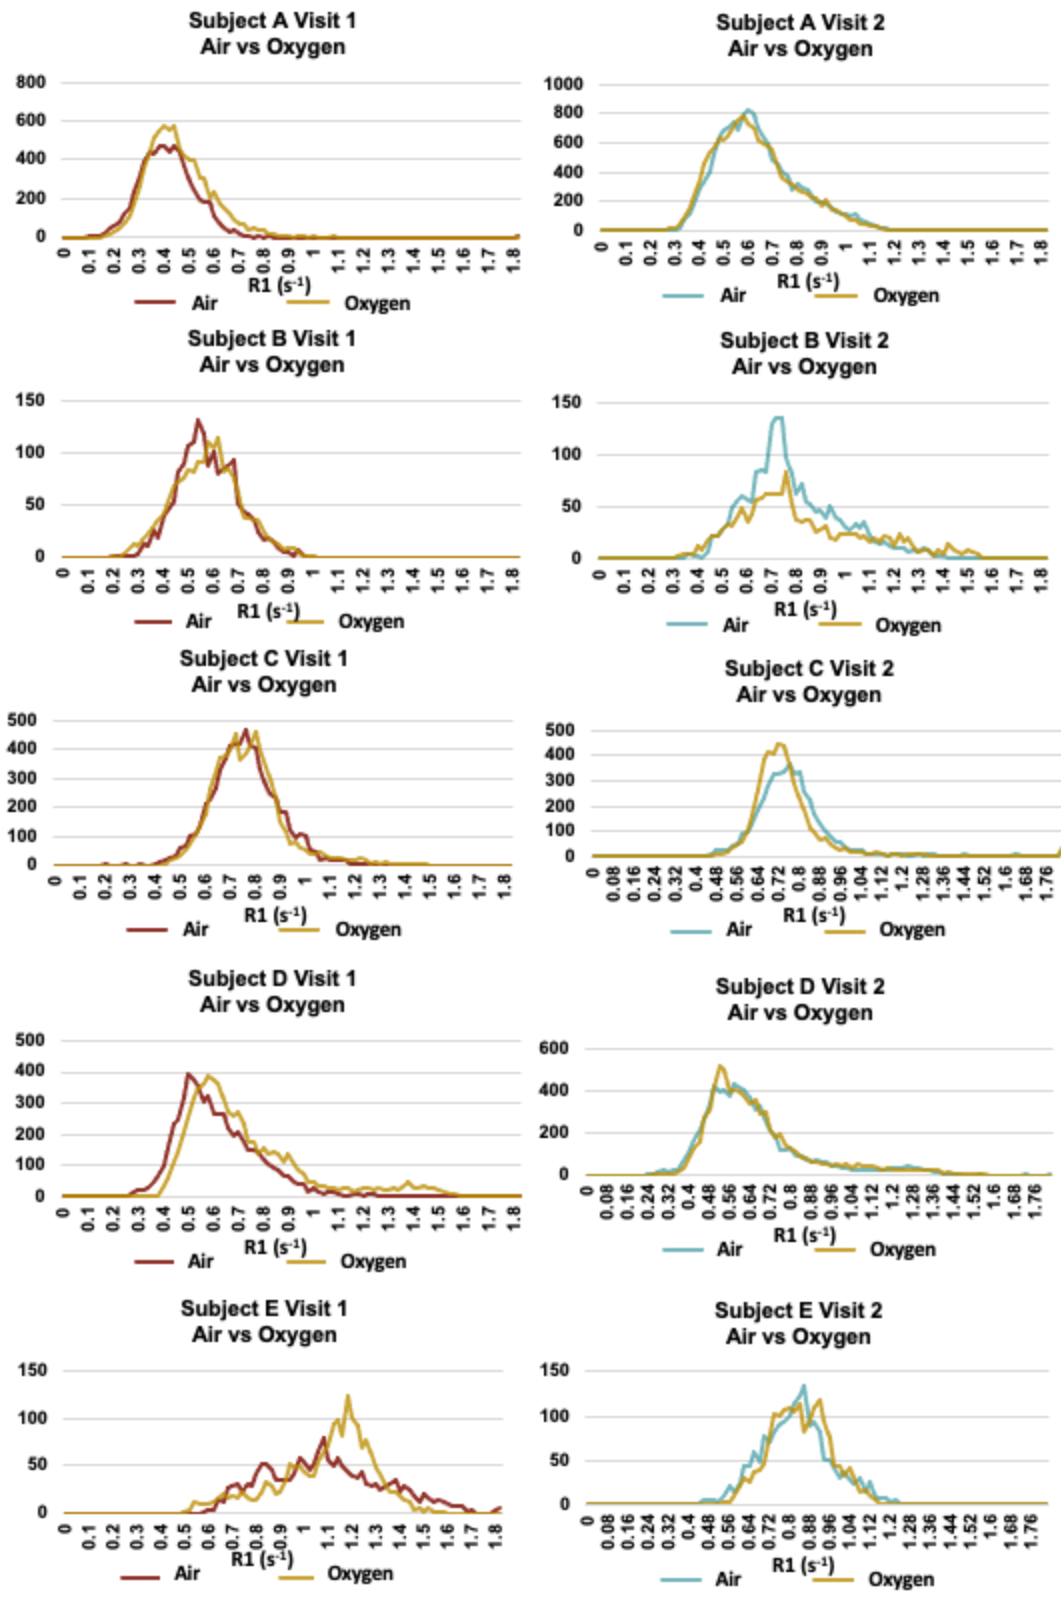

**Supplementary Figure S2.** Histograms of the R1 of the tumour ROI in all patients, while breathing air vs breathing oxygen. The respective mean R1 values are shown in Figure 3.

**A** Visit 1 - Native R1 vs  $\Delta R1$  (Oxygen-Air)

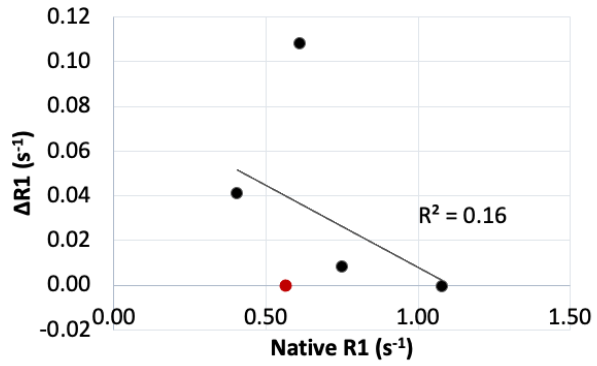

**B** Visit 2 - Native R1 vs  $\Delta R1$  (Oxygen-Air)

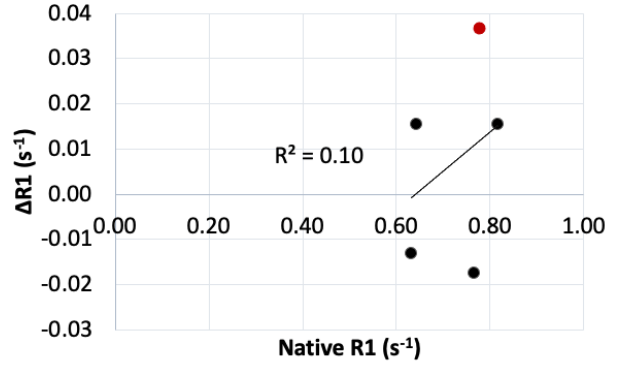

**Supplementary Figure S3.** Across subjects, the  $\Delta R1_{\text{ox-air}}$  did not correlate with native R1 on either visit ( $R^2=0.16$  and  $0.10$  for visit 1 and visit 2, respectively).
